# Supplementary material for: Spread of aggregates after olfactory bulb injection of α-synuclein fibrils is associated with early neuronal loss and is reduced long term
Source: PubMed Central journal article supplement (PMC5756266; doi:10.1007/s00401-017-1792-9), 2017-12-05
Supplement: 401_2017_1792_MOESM4_ESM.pdf [file 401_2017_1792_MOESM4_ESM.pdf]

## Online resource 4

### List of the abbreviations used in the figures

| Abbreviation                   | Structure name                                                        |
|--------------------------------|-----------------------------------------------------------------------|
| AA                             | Anterior amygdaloid area                                              |
| AcbNu                          | Accumbens Nucleus Core and Shell                                      |
| aca                            | Anterior part of the anterior commissure                              |
| aci                            | Anterior part of the anterior commissure, intrabulbar part            |
| ACo                            | Anterior cortical nucleus of the amygdala                             |
| AHiPM, AHiAL                   | Amygdalohippocampal area posteromedial, part anterolateral part       |
| APir                           | Amygdalopiriform transition area                                      |
| AON                            | Anterior olfactory nucleus                                            |
| AOB                            | Accessory olfactory bulb                                              |
| Au2                            | Secondary auditory cortex                                             |
| BAOT                           | Bed nucleus of accessory olfactory tract                              |
| BLA, BLV, BLP                  | Basal amygdaloid nucleus                                              |
| BMA, BMP, BML                  | Accessory basal amygdaloid nucleus (Amygdala)                         |
| CA                             | Cornu Ammonis of the hippocampus                                      |
| CeA                            | Central amygdaloid nucleus (Amygdala)                                 |
| CeL, CeM, CeC                  | Central amygdaloid nucleus (Amygdala), Lateral, Medial, Central       |
| Cg                             | Cingulate cortex                                                      |
| CGb                            | Central gray, beta part                                               |
| Cp                             | Cerebral crus                                                         |
| CPu                            | Caudate putamen                                                       |
| CxA                            | Cortex amygdala transition area                                       |
| DEn, IEn                       | Dorsal endopiriform nucleus, Immediate endopiriform Nucleus           |
| DG                             | Dentate Gyrus                                                         |
| DMX                            | Dorsal motor nucleus of the vagus nerve                               |
| DP                             | Dorsal peduncular cortex                                              |
| Ect                            | Ectorhinal cortex                                                     |
| Ent, DiEnt, MiEnt, CEnt, ViEnt | Entorhinal cortex                                                     |
| E/OV                           | Ependymal and subependymal layer/olfactory ventricle                  |
| FC                             | Frontal cortex and orbital cortex                                     |
| HDB                            | Magnocellular preoptic nucleus                                        |
| GP                             | Globus pallidus                                                       |
| Hipp                           | Hippocampus                                                           |
| IC                             | Internal capsule                                                      |
| Ins                            | Insular cortex                                                        |
| IL                             | Infra-limbic cortex                                                   |
| IPR                            | Interpeduncular nucleus                                               |
| iRt, 7SH                       | Intermediate reticular nucleus; facial motor nucleus, stylohyoid part |
| LC                             | Locus Coeruleus                                                       |
| LH                             | Lateral hypothalamic area                                             |
| LPO                            | Lateral preoptic nucleus                                              |
| LSI                            | Lateral septal nucleus                                                |
| M2                             | Secondary motor cortex                                                |
| MeAD, MePV                     | Medial Nucleus of the amygdala                                        |
| Med                            | Medial cerebellar nucleus                                             |
| mPtA                           | Medial parietal association cortex                                    |
| Mol                            | Molecular layer of the hippocampus                                    |
| MoDG                           | Molecular layer, dentate gyrus                                        |
| mVeMC, mVePC                   | Medial vestibular nucleus, magnocellular part, parvicellular part     |
| nLOT                           | Nucleus of the lateral olfactory tract                                |
| OB                             | Olfactory bulb                                                        |
| Or                             | Oriens layer of the hippocampus                                       |
| OT                             | Olfactory tubercle                                                    |
| PBP                            | Parabrachial pigmented nucleus                                        |
| PC                             | Piriform cortex                                                       |
| PLCo                           | Posterolateral cortical amygdaloid area                               |
| PLH                            | Peduncular part of the lateral hypothalamic area                      |

|               |                                                                    |
|---------------|--------------------------------------------------------------------|
| PMCo          | Posteromedial cortical amygdaloid area                             |
| PoDG          | Pyramidal layer, dentate gyrus                                     |
| PRh           | Perirhinal cortex                                                  |
| PVA           | Paraventricular thalamic nucleus, anterior part                    |
| PVP           | Paraventricular thalamic nucleus, posterior part                   |
| Pyr           | Pyramidal layer of the hippocampus                                 |
| REth          | Retroethmoid nucleus                                               |
| Rad           | Radial layer of the hippocampus                                    |
| rmx, RML      | Retromammillary decussation, retromammillary nucleus, lateral part |
| RN            | Dorsal and medial raphe nuclei                                     |
| S1            | Primary somatosensory cortex                                       |
| S2            | Secondary somatosensory cortex                                     |
| SC            | Superior colliculus                                                |
| SFi           | Septofimbrial nucleus                                              |
| SN, SNR, SNpc | Substantia nigra, reticulata, pars compacta                        |
| STMAM, STMPM  | Antero medial part of the bed nucleus of the stria terminalis      |
| STr           | Subiculum transition area                                          |
| TeA           | Temporal cortex association area                                   |
| TT            | Tenia tecta                                                        |
| V2            | Secondary visual cortex                                            |
| VS            | Ventral subiculum                                                  |
| VP            | Ventral pallidum                                                   |
| VTA           | Ventral tegmental area                                             |
