# Supplementary material for: Spread of aggregates after olfactory bulb injection of α-synuclein fibrils is associated with early neuronal loss and is reduced long term
Source: PubMed Central journal article supplement (PMC5756266; doi:10.1007/s00401-017-1792-9), 2017-12-05
Supplement: 401_2017_1792_MOESM5_ESM.pdf [file 401_2017_1792_MOESM5_ESM.pdf]

## Online resource 5: Linear mixed effect model analysis of pser129 quantifications

### a. Comparison of ipsilateral versus contralateral sides, within the same experimental groups and delays post-injection.

Analyses for each brain regions were performed separately, but are presented in the same table for easier reading. <sup>^</sup> p<0.05, <sup>^^</sup> p<0.01, <sup>^^^</sup> p< 0.001. M. estim. = Model estimate

| Brain region | Linear mixed effect model | 12 mo      |              |              | 18 mo      |              |               |
|--------------|---------------------------|------------|--------------|--------------|------------|--------------|---------------|
|              |                           | mMs        | HuPFFs       | mPFFs        | mMs        | HuPFFs       | mPFFs         |
| OB           | M. Estim.                 | -0.2415421 | -2.1282153   | -2.4606963   | -0.0988964 | -1.4449104   | 2.5365672     |
|              | SE                        | 0.6318344  | 0.6318344    | 0.7064124    | 0.7064124  | 0.6318344    | 0.8156947     |
|              | p-value                   | 0.8426982  | 0.0022689 ^^ | 0.0022689 ^^ | 0.8886615  | 0.0333069 ^  | 0.0037455 ^^  |
| AON          | M. Estim.                 | 0.2698275  | -1.4503223   | -1.0137230   | -0.4571813 | -1.6265008   | -0.7691579    |
|              | SE                        | 0.4722032  | 0.4722032    | 0.4722032    | 0.5279392  | 0.4722032    | 0.6096117     |
|              | p-value                   | 0.5677133  | 0.0063918 ^^ | 0.0636193    | 0.4638057  | 0.0034328 ^^ | 0.3105755     |
| aPC          | M. Estim.                 | 0.1276413  | -1.8216912   | -1.7025134   | 0.8088221  | -2.0827230   | -2.7913161    |
|              | SE                        | 0.3923716  | 0.3923716    | 0.3923716    | 0.5065496  | 0.4530717    | 0.5849131     |
|              | p-value                   | 0.7449487  | 0.0000086 ^^ | 0.0000215 ^^ | 0.1323915  | 0.0000086 ^^ | 0.0000086b ^^ |
| pPC          | M. Estim.                 | 0.2237275  | -2.1453953   | -1.8106423   | -0.6666596 | -3.6460458   | -1.8887278    |
|              | SE                        | 0.5569773  | 0.5569773    | 0.5569773    | 0.6227195  | 0.5569773    | 0.7190546     |
|              | p-value                   | 0.6879184  | 0.0003517 ^^ | 0.0023013 ^^ | 0.3412399  | 0.0000000 ^^ | 0.0129333 ^   |
| PC           | M. Estim.                 | 0.1813210  | -1.9837258   | -1.7828835   | 0.0710812  | -2.8643844   | -2.3400220    |
|              | SE                        | 0.3162032  | 0.3162032    | 0.3162032    | 0.3872683  | 0.3463833    | 0.4471789     |
|              | p-value                   | 0.6796228  | 0.0000000 ^^ | 0.0000000 ^^ | 0.8543703  | 0.0000000 ^^ | 0.0000003 ^^  |
| Ent          | M. Estim.                 | 0.0461447  | -2.3131974   | -1.5910613   | -0.0927822 | -2.6742402   | -3.0255354    |
|              | SE                        | 0.4498931  | 0.4498931    | 0.5029958    | 0.5029958  | 0.4498931    | 0.5808095     |
|              | p-value                   | 0.9183058  | 0.0000005 ^^ | 0.0023409 ^^ | 0.9183058  | 0.0000000 ^^ | 0.0000005 ^^  |

**b. Comparison between experimental groups, within same side of the brain and same delay.**

Analyses for each brain regions were performed separately, but are presented in the same table for easier reading. \* p<0.05, \*\* p<0.01, \*\*\* p<0.001 for comparisons to mMs; # p<0.05, ## p<0.01, ### p<0.001 for comparisons between mPFFs and huPFFs. M. estim. = Model estimate

| Brain region | Side           | Linear mixed effect model | 12 mo         |               |               | 18 mo         |               |              |
|--------------|----------------|---------------------------|---------------|---------------|---------------|---------------|---------------|--------------|
|              |                |                           | huPFFs/ mMs   | mPFFs/mMs     | huPFFs/mPFFs  | huPFFs/ mMs   | mPFFs/mMs     | huPFFs/mPFFs |
| OB           | Ipsi-lateral   | M. estim.                 | 4.9647172     | -6.9911420    | -2.0264248    | 2.4860425     | -0.0516132    | 2.4344292    |
|              |                | SE                        | 0.7505855     | 0.7961162     | 0.7961162     | 0.7961162     | 0.9064182     | 0.8667015    |
|              |                | p-value                   | 0.000000 ***  | 0.000000 ***  | 0.0130988 #   | 0.0035838 **  | 0.9545914     | 0.007458 ##  |
|              | Contra-lateral | M. estim.                 | 3.0780440     | -4.7719880    | -1.6939440    | 1.1400280     | -2.6870770    | -1.5470480   |
|              |                | SE                        | 0.7505855     | 0.7961162     | 0.7961162     | 0.7961162     | 0.9064182     | 0.8667015    |
|              |                | p-value                   | 0.0001235 *** | 0.000000 ***  | 0.0500355     | 0.1521474     | 0.0060635 **  | 0.0891167    |
| AON          | Ipsi-lateral   | M. estim.                 | 4.6859919     | -5.9153911    | -1.2293992    | 3.0398960     | -2.3964439    | 0.6434521    |
|              |                | SE                        | 0.5596034     | 0.5596034     | 0.5596034     | 0.5935490     | 0.6757853     | 0.6461743    |
|              |                | p-value                   | 0.0000000 *** | 0.0000000 *** | 0.0336321 #   | 0.0000006 *** | 0.0005863 *** | 0.3193536    |
|              | Contra-lateral | M. estim.                 | 2.9658421     | -4.6318407    | -1.6659985    | 1.8705765     | -2.0844673    | -0.2138908   |
|              |                | SE                        | 0.5596034     | 0.5596034     | 0.5596034     | 0.5935490     | 0.6757853     | 0.6461743    |
|              |                | p-value                   | 0.0000003 *** | 0.0000000 *** | 0.0034918 ##  | 0.0030583 **  | 0.0030583 **  | 0.7406362    |
| aPC          | Ipsi-lateral   | M. estim.                 | 2.7881870     | -4.4508940    | -1.6627070    | 3.1702950     | -2.8222260    | 0.3480690    |
|              |                | SE                        | 0.3870358     | 0.3870358     | 0.3870358     | 0.5329051     | 0.6067392     | 0.5801536    |
|              |                | p-value                   | 0.0000000 *** | 0.0000000 *** | 0.0000209 ### | 0.0000000 *** | 0.0000049 *** | 0.5485328    |
|              | Contra-lateral | M. estim.                 | 0.8388548     | -2.6207396    | -1.7818848    | 0.2787496     | 0.7779126     | 1.0566622    |
|              |                | SE                        | 0.5024278     | 0.5024278     | 0.5024278     | 0.5329051     | 0.6067392     | 0.5801536    |
|              |                | p-value                   | 0.1424970     | 0.0000011 *** | 0.0011709 ##  | 0.6009218     | 0.2397606     | 0.1371077    |
| pPC          | Ipsi-lateral   | M. estim.                 | 2.7532726     | -4.2592406    | -1.5059680    | 3.6456037     | -3.0675061    | 0.5780976    |
|              |                | SE                        | 0.5569773     | 0.5569773     | 0.5569773     | 0.5907636     | 0.6726140     | 0.6431420    |
|              |                | p-value                   | 0.0000015 *** | 0.0000000 *** | 0.0082256 ##  | 0.0000000 *** | 0.0000077 *** | 0.3687247    |
|              | Contra-lateral | M. estim.                 | 0.3841498     | -2.2248709    | -1.8407210    | 0.6662176     | -1.8454379    | -1.1792204   |
|              |                | SE                        | 0.5569773     | 0.5569773     | 0.5569773     | 0.5907636     | 0.6726140     | 0.6431420    |
|              |                | p-value                   | 0.4903799     | 0.0003889 **  | 0.0028509 ##  | 0.3113244     | 0.0121509 *** | 0.1000856    |
| PC           | Ipsi-lateral   | M. estim.                 | 2.7765490     | -4.3870097    | -1.6104606    | 3.4079492     | -2.9448659    | 0.4630833    |
|              |                | SE                        | 0.3883009     | 0.3883009     | 0.3883009     | 0.4632686     | 0.4987108     | 0.4742004    |
|              |                | p-value                   | 0.0000000 *** | 0.0000000 *** | 0.0000403 ### | 0.0000000 *** | 0.0000000 *** | 0.3287889    |
|              | Contra-lateral | M. estim.                 | 0.6115023     | -2.4228052    | -1.8113029    | 0.4724836     | -0.5337627    | -0.0612791   |
|              |                | SE                        | 0.4367738     | 0.4367738     | 0.4367738     | 0.4632686     | 0.4987108     | 0.4742004    |
|              |                | p-value                   | 0.3230007     | 0.0000002 *** | 0.0001011 ### | 0.3693361     | 0.3693361     | 0.8971787    |
| Ent          | Ipsi-lateral   | M. estim.                 | 4.3141972     | -7.2342055    | -2.9200083    | 4.8852957     | -4.2210985    | 0.6641973    |
|              |                | SE                        | 0.5303450     | 0.5625158     | 0.5625158     | 0.5625158     | 0.6404524     | 0.6123896    |
|              |                | p-value                   | 0.0000000 *** | 0.0000000 *** | 0.0000003 ### | 0.0000000 *** | 0.0000000 *** | 0.2780992    |
|              | Contra-lateral | M. estim.                 | 1.9548550     | -5.5969990    | -3.6421440    | 2.3038380     | -1.2883450    | 1.0154920    |
|              |                | SE                        | 0.5303450     | 0.5625158     | 0.5625158     | 0.5625158     | 0.6404524     | 0.6123896    |
|              |                | p-value                   | 0.0003417 *** | 0.0000000 *** | 0.0000000 ### | 0.0000842 **  | 0.0531123     | 0.0972679    |

**c. Comparison of 12 mo versus 18 mo delays, within same experimental groups and same side of the brain.**

Analyses for each brain regions were performed separately, but are presented in the same table for easier reading. \$ p<0.05, \$\$ p<0.01, \$\$\$ p<0.001. M. estimate= Model estimate

| Brain region | Side           | Linear mixed effect model | mMs              | huPFFs       | mPFFs            |
|--------------|----------------|---------------------------|------------------|--------------|------------------|
| OB           | Ipsi-lateral   | M. estim.                 | -1.2572934       | 1.2213813    | 5.6822353        |
|              |                | SE                        | 0.7961162        | 0.7505855    | 0.9064182        |
|              |                | p-value                   | 0.1714064        | 0.1714064    | 0.0000000 \$\$\$ |
|              | Contra-lateral | M. estim.                 | -1.3999392       | 0.5380763    | 0.6849719        |
|              |                | SE                        | 0.7961162        | 0.7505855    | 0.9064182        |
|              |                | p-value                   | 0.1714064        | 0.4734510    | 0.4734510        |
| AON          | Ipsi-lateral   | M. estim.                 | -2.3096783       | -0.6635824   | 1.2092689        |
|              |                | SE                        | 0.5935490        | 0.5596034    | 0.6461743        |
|              |                | p-value                   | 0.0005982 \$\$\$ | 0.2828375    | 0.1225715        |
|              | Contra-lateral | M. estim.                 | -1.5826695       | -0.4874039   | 0.9647038        |
|              |                | SE                        | 0.5935490        | 0.5596034    | 0.6461743        |
|              |                | p-value                   | 0.022997 \$      | 0.3837645    | 0.2031767        |
| aPC          | Ipsi-lateral   | M. estim.                 | 1.2148021        | 0.8326947    | 2.8434706        |
|              |                | SE                        | 0.4823581        | 0.4484587    | 0.5340971        |
|              |                | p-value                   | 0.0235735 \$     | 0.0760088    | 0.0000003 \$\$\$ |
|              | Contra-lateral | M. estim.                 | 0.5336212        | 1.0937265    | 3.9322734        |
|              |                | SE                        | 0.5329051        | 0.5024278    | 0.5801536        |
|              |                | p-value                   | 0.3166606        | 0.0442339 \$ | 0.0000000 \$\$\$ |
| pPC          | Ipsi-lateral   | M. estim.                 | 0.5282631        | -0.3640680   | 1.7199976        |
|              |                | SE                        | 0.5907636        | 0.5569773    | 0.6431420        |
|              |                | p-value                   | 0.4454554        | 0.5133375    | 0.0224611 \$     |
|              | Contra-lateral | M. estim.                 | 1.4186502        | 1.1365825    | 1.7980831        |
|              |                | SE                        | 0.5907636        | 0.5569773    | 0.6431420        |
|              |                | p-value                   | 0.0326664 \$     | 0.0619320    | 0.0224611        |
| PC           | Ipsi-lateral   | M. estim.                 | 0.8658960        | 0.2344958    | 2.3080398        |
|              |                | SE                        | 0.4411586        | 0.4132487    | 0.4526247        |
|              |                | p-value                   | 0.0596065        | 0.5704120    | 0.000001 \$\$\$  |
|              | Contra-lateral | M. estim.                 | 0.9761357        | 1.1151545    | 2.8651783        |
|              |                | SE                        | 0.4632686        | 0.4367738    | 0.4742004        |
|              |                | p-value                   | 0.0526683        | 0.02135 \$   | 0.0000000 \$\$\$ |
| Ent          | Ipsi-lateral   | M. estim.                 | 0.8401741        | 0.2690756    | 3.8532811        |
|              |                | SE                        | 0.5625158        | 0.5303450    | 0.6404524        |
|              |                | p-value                   | 0.2029200        | 0.6119026    | 0.0000000 \$\$\$ |
|              | Contra-lateral | M. estim.                 | 0.9791010        | 0.6301184    | 5.2877552        |
|              |                | SE                        | 0.5625158        | 0.5303450    | 0.6404524        |
|              |                | p-value                   | 0.1635162        | 0.2817390    | 0.0000000 \$\$\$ |

**d. Comparison between quantifications in aPC and pPC**

|           | <b>aPC vs pPC</b> |
|-----------|-------------------|
| M. estim. | 0.0426258         |
| SE        | 0.1344211         |
| p-value   | 0.7511627         |
