# Supplementary material for: Spread of aggregates after olfactory bulb injection of α-synuclein fibrils is associated with early neuronal loss and is reduced long term
Source: PubMed Central journal article supplement (PMC5756266; doi:10.1007/s00401-017-1792-9), 2017-12-05
Supplement: 401_2017_1792_MOESM6_ESM.pdf [file 401_2017_1792_MOESM6_ESM.pdf]

## Online resource 6: Linear mixed effect model analysis of cresyl-positive cells quantifications

### a. Comparison of ipsilateral versus contralateral sides for each experimental group and delay.

<sup>^</sup> p<0.05, <sup>^^</sup> p<0.01, <sup>^^^</sup> p< 0.001. M. estim. = Model estimate

| Delay | Cell type     | Linear mixed effect model | Ctl        | mMs       | HuPFFs                   | mPFFs      |
|-------|---------------|---------------------------|------------|-----------|--------------------------|------------|
| 6 mo  | All           | M. Estim.                 | 0.1273718  | 0.0932906 | -0.0660213               | -0.0457503 |
|       |               | SE                        | 0.1048393  | 0.0813596 | 0.0910254                | 0.0814151  |
|       |               | p-value                   | 0.6707416  | 0.6707416 | 0.9186515                | 0.9186515  |
|       | Dark stained  | M. Estim.                 | 0.1303246  | 0.1123022 | -0.1992801               | -0.0124842 |
|       |               | SE                        | 0.1390759  | 0.1078551 | 0.1210392                | 0.1081838  |
|       |               | p-value                   | 0.9081295  | 0.9081295 | 0.7974361                | 0.9081295  |
|       | Light stained | M. Estim.                 | 0.1273563  | 0.0908026 | 0.0487940                | -0.0652603 |
|       |               | SE                        | 0.1518321  | 0.1179213 | 0.1318078                | 0.1178177  |
|       |               | p-value                   | 0.7710894  | 0.7710894 | 0.8128464                | 0.7728550  |
| 18 mo | All           | M. Estim.                 | 0.0233055  | 0.1347899 | 0.0048061                | -0.0301928 |
|       |               | SE                        | 0.1049368  | 0.0913747 | 0.0822450                | 0.1049764  |
|       |               | p-value                   | 0.9419926  | 0.6707416 | 0.9534006                | 0.9419926  |
|       | Dark stained  | M. Estim.                 | -0.0645168 | 0.0877502 | 0.0236020                | -0.0544401 |
|       |               | SE                        | 0.1391695  | 0.1223140 | 0.1104617                | 0.1394721  |
|       |               | p-value                   | 0.9081295  | 0.9081295 | 0.9081295                | 0.9081295  |
|       | Light stained | M. Estim.                 | 0.1069331  | 0.1256423 | 0.5736342                | -0.0139157 |
|       |               | SE                        | 0.1520664  | 0.1319961 | 0.1206111                | 0.1519505  |
|       |               | p-value                   | 0.7710894  | 0.7710894 | 0.0000158 <sup>^^^</sup> | 0.9270315  |

**b. Comparison between experimental groups within same side of the AON and the same delay.**  
 \* p<0.05, \*\* p<0.01, \*\*\* p<0.001 for comparisons to mMs and to Ctl; # p<0.05, ## p<0.01, ### p<0.001 for comparisons between mPFFs and huPFFs. M. estim. = Model estimate

| Delay         | Cell type      | Side           | Linear mixed effect model | Ctl/ mMs      | Ctl/ huPFFs   | Ctl / mPFFs   | mMs/ huPFFs   | mMs/ mPFFs    | huPFFs/ mPFFs |
|---------------|----------------|----------------|---------------------------|---------------|---------------|---------------|---------------|---------------|---------------|
| 6 mo          | All cells      | Ipsi-lateral   | M. Estim.                 | 0.0317883     | 0.8894865     | 0.5869463     | -0.8576983    | 0.5551580     | -0.3025402    |
|               |                |                | SE                        | 0.1845051     | 0.1930231     | 0.1845464     | 0.1695634     | 0.1598474     | 0.1696043     |
|               |                |                | p-value                   | 0.8632101     | 0.0000244 *** | 0.0044109 **  | 0.0000051 *** | 0.0020583 **  | 0.1276390     |
|               |                | Contra-lateral | M. Estim.                 | 0.0658694     | 1.0828796     | 0.7600685     | -1.0170102    | 0.6941990     | -0.3228112    |
|               |                |                | SE                        | 0.1844927     | 0.1929744     | 0.1845418     | 0.1695465     | 0.1598824     | 0.1695989     |
|               |                |                | p-value                   | 0.7210693     | 0.0000001 *** | 0.0001143 *** | 0.0000000 *** | 0.0000565 *** | 0.1139819     |
|               | Dark stained   | Ipsi-lateral   | M. Estim.                 | -0.0622179    | 0.8512679     | 0.4428020     | -0.9134858    | 0.5050199     | -0.4084659    |
|               |                |                | SE                        | 0.3086262     | 0.3229035     | 0.3087010     | 0.2831354     | 0.2668252     | 0.2832155     |
|               |                |                | p-value                   | 0.8402323     | 0.0502905     | 0.2596405     | 0.0150471 *   | 0.1401547     | 0.2596405     |
|               |                | Contra-lateral | M. Estim.                 | -0.0441954    | 1.1808727     | 0.5856109     | -1.2250681    | 0.6298063     | -0.5952618    |
|               |                |                | SE                        | 0.3085971     | 0.3228471     | 0.3086641     | 0.2831266     | 0.2668408     | 0.2831988     |
|               |                |                | p-value                   | 0.9047783     | 0.001527 **   | 0.0990786     | 0.0001814 *** | 0.0730540     | 0.0990786     |
| Light stained | Ipsi-lateral   | M. Estim.      | 0.1177756                 | 1.0155376     | 0.6841849     | -0.8977620    | 0.5664093     | -0.3313527    |               |
|               |                | SE             | 0.1864471                 | 0.1950463     | 0.1865344     | 0.1713428     | 0.1615703     | 0.1714054     |               |
|               |                | p-value        | 0.5755566                 | 0.0000012 *** | 0.000587 ***  | 0.0000012 *** | 0.000911 ***  | 0.0798263     |               |
|               | Contra-lateral | M. Estim.      | 0.1543293                 | 1.0940999     | 0.8768015     | -0.9397706    | 0.7224722     | -0.2172985    |               |
|               |                | SE             | 0.1863414                 | 0.1948616     | 0.1865573     | 0.1711917     | 0.1616636     | 0.1714330     |               |
|               |                | p-value        | 0.5434042                 | 0.0000002 *** | 0.0000104 *** | 0.0000002 *** | 0.0000236 *** | 0.4099234     |               |
| 18 mo         | All cells      | Ipsi-lateral   | M. Estim.                 | 0.4599798     | 0.3981126     | 0.1454395     | 0.0618672     | -0.3145402    | -0.2526730    |
|               |                |                | SE                        | 0.1930503     | 0.1846292     | 0.2063084     | 0.1697449     | 0.1931022     | 0.1846836     |
|               |                |                | p-value                   | 0.0412475 *   | 0.0621234     | 0.5770008     | 0.7805517     | 0.1550077     | 0.2283578     |
|               |                | Contra-lateral | M. Estim.                 | 0.3484953     | 0.4166119     | 0.1989378     | -0.0681166    | -0.1495575    | -0.2176740    |
|               |                |                | SE                        | 0.1930554     | 0.1846798     | 0.2063090     | 0.1698052     | 0.1931074     | 0.1847353     |
|               |                |                | p-value                   | 0.1218002     | 0.0577905     | 0.4465465     | 0.7210693     | 0.5263778     | 0.3580141     |
|               | Dark stained   | Ipsi-lateral   | M. Estim.                 | 0.7901024     | 0.6920332     | 0.3837566     | 0.0980692     | -0.4063458    | -0.3082766    |
|               |                |                | SE                        | 0.3229044     | 0.3088852     | 0.3449538     | 0.2834357     | 0.3223640     | 0.3083203     |
|               |                |                | p-value                   | 0.0576425     | 0.0751906     | 0.3545718     | 0.7956454     | 0.3112235     | 0.3808550     |
|               |                | Contra-lateral | M. Estim.                 | 0.6378355     | 0.6039144     | 0.3736800     | 0.0339210     | -0.2641555    | -0.2302345    |
|               |                |                | SE                        | 0.3230084     | 0.3088963     | 0.3449653     | 0.2835555     | 0.3224726     | 0.3083361     |
|               |                |                | p-value                   | 0.0990786     | 0.0990786     | 0.4180533     | 0.9047783     | 0.5462939     | 0.5462939     |
| Light stained | Ipsi-lateral   | M. Estim.      | 0.2382181                 | 0.7460466     | -0.0315631    | -0.5078285    | -0.2697812    | -0.7776097    |               |
|               |                | SE             | 0.1950609                 | 0.1870274     | 0.2084143     | 0.1719291     | 0.1949954     | 0.1869467     |               |
|               |                | p-value        | 0.2663896                 | 0.0001991 *** | 0.8796255     | 0.0053825 **  | 0.2220048     | 0.0001276 ### |               |
|               | Contra-lateral | M. Estim.      | 0.2195089                 | 0.2793455     | 0.0892857     | -0.0598366    | -0.1302232    | -0.1900598    |               |
|               |                | SE             | 0.1950501                 | 0.1869135     | 0.2084113     | 0.1717607     | 0.1949313     | 0.1867961     |               |
|               |                | p-value        | 0.4464353                 | 0.3240967     | 0.7275608     | 0.7275608     | 0.6049246     | 0.4633932     |               |

**c. Comparison of 6 months versus 18 months delays, within same experimental groups and same side of the brain.**

Analyses for each brain regions were performed separately, but are presented in the same table for easier reading. \$ p<0.05, \$\$ p<0.01, \$\$\$ p<0.001. M. estim. = Model estimate

| Cell type   | Side           | Linear mixed effect model | Ctl              | mMs              | huPFFs           | mPFFs     |
|-------------|----------------|---------------------------|------------------|------------------|------------------|-----------|
| All cells   | Ipsi-lateral   | M. Estim.                 | 0.6897681        | 1.1179596        | 0.1983941        | 0.2482613 |
|             |                | SE                        | 0.1050046        | 0.1696019        | 0.1697091        | 0.1845937 |
|             |                | p-value                   | 0.0000000 \$\$\$ | 0.0000000 \$\$\$ | 0.2770214        | 0.2766555 |
|             | Contra-lateral | M. Estim.                 | 0.7938344        | 1.0764603        | 0.1275667        | 0.2327038 |
|             |                | SE                        | 0.1049088        | 0.1696201        | 0.1697314        | 0.1846134 |
|             |                | p-value                   | 0.0000000 \$\$\$ | 0.0000000 \$\$\$ | 0.4523038        | 0.2766555 |
| Dark cells  | Ipsi-lateral   | M. Estim.                 | 0.4596734        | 1.3119937        | 0.3004387        | 0.4006280 |
|             |                | SE                        | 0.1392783        | 0.2831452        | 0.2834250        | 0.3081286 |
|             |                | p-value                   | 0.001931 \$\$    | 0.0000096 \$\$\$ | 0.3304358        | 0.2580444 |
|             | Contra-lateral | M. Estim.                 | 0.6545148        | 1.3365457        | 0.0775566        | 0.4425839 |
|             |                | SE                        | 0.1392119        | 0.2832711        | 0.2834119        | 0.3081401 |
|             |                | p-value                   | 0.0000096 \$\$\$ | 0.0000096 \$\$\$ | 0.7843511        | 0.2414639 |
| Light cells | Ipsi-lateral   | Model estimate            | 0.8696058        | 0.9900483        | 0.6001149        | 0.1538579 |
|             |                | SE                        | 0.1520737        | 0.1713408        | 0.1719170        | 0.1864867 |
|             |                | p-value                   | 0.0000000 \$\$\$ | 0.0000000 \$\$\$ | 0.0007707 \$\$\$ | 0.5458032 |
|             | Contra-lateral | M. Estim.                 | 0.8900290        | 0.9552086        | 0.0752746        | 0.1025133 |
|             |                | SE                        | 0.1518788        | 0.1712700        | 0.1716826        | 0.1865726 |
|             |                | p-value                   | 0.0000000 \$\$\$ | 0.0000000 \$\$\$ | 0.6610584        | 0.6610584 |
